# Supplementary material for: Human Osteochondral Explants as an Ex Vivo Model of Osteoarthritis for the Assessment of a Novel Class of Orthobiologics
Source: Pharmaceutics. 2022 Jun 10;14(6):1231. doi: 10.3390/pharmaceutics14061231 (PMC9229444; doi:10.3390/pharmaceutics14061231)
Supplement: Supplementary file 1 [file pharmaceutics-14-01231-s001.zip › Supplementary S1-S5.xlsx]

## Sheet: Supplementary S1
Supplementary S1 : Characteristics of the donors included in the study. The table shows the number of enrolled donors for each endpoint, their sex, age, BMI and OA grade at the day of knee replacement surgery.
		experimental endpoint
		Day 1	Day 3	Day 6
	n. of donors	8	9	5
	Gender F/M	5/3	6/3	3/2
	Mean age ± SD	67±9	76±5	65±11
	Age range	51-78	67-83	55-80
	Mean BMI ± SD	29±6	28±5	27±5
	BMI range	21-39	21-34	21-35
	OA grade III/IV	5/3	8/1	5/0
	F=female, M=male
	Age is expressed in years
	BMI=body mass index

## Sheet: Supplementary S2
Supplementary S2: Lipids quantified in explant supernatants at day 3. Data are normalized on the wet weight of each explant. The list of quantified bioactive lipids, together with their levels expressed as ng/mL or pg/mL, is reported. Bar graphs show the modulation of selected molecules under the different stimuli.
					ng/ml					pg/ml
	List of quantified lipids				mean	SD				mean	SD
	AA		AA	CTRL	63.1253	13.8275		2AG	CTRL	123.977	13.0563
	EPA			CM	125.716	63.607			CM	165.455	40.7674
	DHA			TNF	92.0231	17.3955			TNF	315.423	75.4923
	PGE2			TNF+CM	43.6155	7.27027			TNF+CM	211.574	111.596
	PGD2		EPA	CTRL	6.47902	5.0538		TXB2	CTRL	103.333	33.127
	PGF2			CM	8.26982	4.48388			CM	134.318	32.8431
	2AG			TNF	8.72045	3.77829			TNF	151.667	176.092
	TXB2			TNF+CM	4.34	0.991158			TNF+CM	100.093	15.4768
	PEA		DHA	CTRL	6.83822	3.12608		PEA	CTRL	92.8409	27.84
	SEA			CM	9.43487	3.89596			CM	117.698	50.3245
	15HETE			TNF	9.35279	3.37332			TNF	202.857	158.437
				TNF+CM	5.2638	1.20553			TNF+CM	109.352	32.9144
			PGE2	CTRL	14.9328	18.3236		SEA	CTRL	16.4773	14.4506
				CM	12.5061	15.0551			CM	19.9134	12.7421
				TNF	5.08074	6.32354			TNF	59.3519	63.7585
				TNF+CM	22.6213	34.7029			TNF+CM	47.1296	28.1973
			PGD2	CTRL	9.7	12.3397		15HETE	CTRL	15.4924	23.4009
				CM	8.08688	9.93414			CM	64.1558	57.3766
				TNF	3.23128	3.99772			TNF	16.4153	14.4815
				TNF+CM	15.1145	23.1704			TNF+CM	22.963	33.1538
			PGF2	CTRL	4.54155	3.3191
				CM	3.76992	2.52351
				TNF	1.82807	0.971936
				TNF+CM	6.36815	7.86199

## Sheet: Supplementary S3
Supplementary S3: Proteases detected in explant supernatants at day 3. The list of quantified proteases is shown together with the mean spot density expressed as arbitrary units (AU).
					AU
			analyte ID and coordinates		CTRL	CM	TNF	TNF+CM
	List of detected proteases		Reference Spots	A1, A2
	ADAM8		ADAM8	A3, A4	7286.84	6905.35	5044.31	7514.33
	ADAM9		ADAM9	A5, A6	9452.42	9977.4	8897.09	11457.4
	ADAMTS1		ADAMTS1	A7, A8	30269.8	27649.8	26838.5	35502.5
	ADAMTS13		ADAMTS13	A9, A10	2005.65	1444.35	2636.38	3767.08
	Cathepsin A		Cathepsin A	A11, A12	16511.3	44332.7	14591.4	52073.4
	Cathepsin B		Cathepsin B	A13, A14	126661	112385	126649	126624
	Cathepsin C		Cathepsin C	A15, A16	8483.4	7682.04	6855.19	14023.2
	Cathepsin D		Cathepsin D	A17, A18	198765	215317	207713	249011
	Cathepsin E		Reference Spots	A19, A20
	Cathepsin L		Cathepsin E	B3, B4	4277.67	3630.35	2747.76	5167.9
	Cathepsin S		Cathepsin L	B5, B6	10010.6	15255.8	11038.5	19736.3
	Cathepsin V		Cathepsin S	B7, B8	67996.8	65761	66459.9	76543.3
	Cathepsin X/Z/P		Cathepsin V	B9, B10	6240.36	6917.58	9584.16	8629.91
	DPPIV/CD26		Cathepsin X/Z/P	B11, B12	51480.3	63784.8	46572.9	70390.1
	Kallikrein 3/PSA		DPPIV/CD26	B13, B14	31115.8	63923.6	25657.7	76286.3
	Kallikrein 7		Kallikrein 3/PSA	B15, B16
	Kallikrein 10		Kallikrein 5	B17, B18
	Kallikrein 11		Kallikrein 6	C3, C4	2312.37	2161.08	1041.68	2169.42
	Kallikrein 13		Kallikrein 7	C5, C6	4099.81	4367.95	3782.47	4759.33
	MMP-1		Kallikrein 10	C7, C8	1639.52	2778.47	4211.47	3365.62
	MMP-2		Kallikrein 11	C9, C10	1272.33	1443.22	2386.07	2064.47
	MMP-3		Kallikrein 13	C11, C12	2866.12	3241.17	2022.03	4440.9
	MMP-7		MMP-1	C13, C14	120615	104355	141569	156390
	MMP-8		MMP-2	C15, C16	152406	159942	161052	215464
	MMP-9		MMP-3	C17, C18	80021.5	115468	64854.1	92135.5
	MMP-10		MMP-7	D3, D4	10595	9994.86	10252.1	15331.4
	MMP-12		MMP-8	D5, D6	18842.1	17736.2	14817.9	28776.2
	MMP-13		MMP-9	D7, D8	156765	114115	160035	150586
	Neprilysin/CD10		MMP-10	D9, D10	8779.48	8911.2	17550.3	13826.5
	Presenilin		MMP-12	D11, D12	34573.3	15370.8	24622.7	28215.5
	Proprotein Convertase 9		MMP-13	D13, D14	94609.5	71182.4	93639.4	113539
	Proteinase 3		Neprilysin/CD10	D15, D16	1314.01	1293.79	1385.69	3756.74
	uPA/Urokinase		Presenilin	D17, D18	2545.13	1493.12	2706.11	3510.28
			Reference Spots	E1, E2
			Proprotein Convertase 9	E3, E4	1503.91	2097	1520.6	3018.93
			Proteinase 3	E5, E6	1829.1	2966.75	2558.81	3069.1
			uPA/Urokinase	E7, E8	54857.1	60620.4	18342.1	61656.3
			Negative Control	E9, E10

## Sheet: Supplementary S4
Supplementary S4: Cytokines detected in explant supernatants at day 3. The list of quantified cytokines is shown together with the mean spot density expressed as arbitrary units (AU). The molecules previously quantified in CM batches are highlighted in blue and their mean content is reported as pg/106 ASCs.
					AU
			analyte ID and coordinates		CTRL	CM	TNF	TNF+CM
	List of detected cytokines		Reference spot	A1,A2						[] in ASC-CM*		*mean content in ASC-CM expressed as pg/106ASCs [from Giannasi et al. 2021, doi: 10.1155/2021/3086122 ]
	Adiponectin		Adiponectin	A3,A4	87959.9	97532.2	103662	179584
	Apolipoprotein A-1		Apolipoprotein A-1	A5,A6	64682.6	103625	85335.2	69275.8
	Angiogenin		Angiogenin	A7,A8	159652	220691	217990	177123		95.3057
	Angiopoietin-1		Angiopoietin-1	A9,A10	439.326	1609.32	2082.89	2220.42
	Angiopoietin-2		Angiopoietin-2	A11,A12	67098.1	58753.7	87624.9	100069
	BAFF		BAFF	A13,A14	1275.81	2097.9	2416.1	2729.67
	BDNF		BDNF	A15,A16	2308.81	2999.99	1723.37	3881.9
	Complement Component C5/C5a		Complement Component C5/C5a	A17,A18	1835.19	4935.36	8970.6	6579.03
	CD14		CD14	A19,A20	7127.67	9830.35	12743.2	11803		435.132
	CD40 ligand		CD30	A21,A22
	Chitinase 3-like 1		Reference spot	A23,A24
	Complement Factor D		CD40 ligand	B3,B4	2982.03	8261.18	4431.69	6026.38
	C-reactive protein		Chitinase 3-like 1	B5,B6	135340	175546	184377	145720
	Cystatin C		Complement Factor D	B7,B8	16544	33153.5	24210.5	26897.4
	Dkk-1		C-reactive protein	B9,B10	2599.03	11345	9255.43	5490.95
	DPPIV		Cripto-1	B11,B12
	Emmprin		Cystatin C	B13,B14	15317	46912.9	15321.7	24681.3
	ENA-78		Dkk-1	B15,B16	2738.97	113986	6100.94	136597		839.063
	Endoglin		DPPIV	B17,B18	37733.9	58710.9	45019.3	57621.9
	FGF-19		EGF	B19,B20
	G-CSF		Emmprin	B21,B22	10225	21281.2	17131.9	23880.8
	GDF-15		ENA-78	C3,C4	154849	191247	183955	189706		163.626
	GM-CSF		Endoglin	C5,C6	13067	29968.8	23217.8	32167.8		33.6091
	GROα		Fas Ligand	C7,C8
	HGF		FGF basic	C9,C10
	ICAM-1		FGF-7	C11,C12
	IFN-γ		FGF-19	C13,C14	10071.5	26541.8	14641	17611.8
	IGFBP-2		Flt-3 Ligand	C15,C16
	IGFBP-3		G-CSF	C17,C18	14531.9	10343.2	20020.3	19894.6		2.50423
	IL-1 ra		GDF-15	C19,C20	6673.9	36654.5	12214.8	32951.5
	IL-4		GM-CSF	C21,C22	70802.9	51176.1	110070	111221		6.62149
	IL-6		GROα	D1,D2	32134.5	53008.9	50548.4	46877.5
	IL-8		Growth Hormone	D3,D4
	IL-11		HGF	D5,D6	483.694	4537.63	1150.28	1227.85		460.489
	IL-17A		ICAM-1	D7,D8	1636.98	9239.42	2949.79	2995.4		211.121
	IL-18Bpa		IFN-γ	D9,D10	2536.76	4592.19	4468.46	5421.53		7.951
	IL-19		IGFBP-2	D11,D12	10474.9	19548.6	9388.93	18875.6		317.657
	IP-10		IGFBP-3	D13,D14	39210	61805.9	33384.3	63934.2
	Kallikrein 3		IL-1α	D15,D16
	Leptin		IL-1β	D17,D18
	LIF		IL-1 ra	D19,D20	8264.58	13285.2	11597.7	13561.2
	Lipocalin-2		IL-2	D21,D22
	MCP-1		IL-3	D23,D24
	MCP-3		IL-4	E1,E2	1765.74	6501.4	4224.29	3604.1		0.3277
	M-CSF		IL-5	E3,E4
	MIF		IL-6	E5,E6	96289.5	143305	155532	133472
	MIP-1α/MIP-1β		IL-8	E7,E8	121941	166147	170880	148216		20.2381
	MIP-3α		IL-10	E9,E10
	MMP9		IL-11	E11,E12	22200.9	30974.4	29177.6	29519.2		3.7775
	Osteopontin		IL-12 p70	E13,E14
	PDGF-AA		IL-13	E15,E16
	Pentraxin 3		IL-15	E17,E18
	RBP-4		IL-16	E19,E20
	Resistin		IL-17A	E21,E22	6339.67	15429.1	13868.5	10608.3		0.200728
	SDF-1α		IL-18Bpa	E23,E24	2215.09	5226.56	5074	6858.9
	Serpin E1		IL-19	F1,F2	5825.24	3571.63	10622.4	2057.49
	ST2		IL-22	F3,F4
	TFF3		IL-23	F5,F6
	Thrombospondin-1		IL-24	F7,F8
	uPAR		IL-27	F9,F10
	VEGF		IL-31	F11,F12
	Vitamin D BP		IL-32	F13,F14
	CD31		IL-33	F15,F16
	TIM-3		IL-34	F17,F18
	Vcam-1		IP-10	F19,F20	5183.65	4476.25	4362.31	8238.67		8.36348
			I-TAC	F21,F22
			Kallikrein 3	F23,F24	2102.63	4689	4501.58	4312.02
			Leptin	G1,G2	238053	164008	215878	275007
			LIF	G3,G4	9733.06	17188.3	17569.7	15940.6
			Lipocalin-2	G5,G6	10332.7	9215.86	29942.5	13318.3
			MCP-1	G7,G8	58241.8	82050.1	87691.4	74915.6		49.0354
			MCP-3	G9,G10	28332.1	26766.5	33348.7	24647.4		21.6758
			M-CSF	G11,G12	3330.94	6827.89	4546.63	7029.83		9.89071
			MIF	G13,G14	26617.6	41573.8	32872.2	36657.9
			MIG	G15,G16
			MIP-1α/MIP-1β	G17,G18	48618	49124.4	63058.8	68211.5		2.21466
			MIP-3α	G19,G20	88061.2	89321.1	135827	122542		0.906898
			MIP-3β	G21,G22
			MMP9	G23,G24	50344.6	66358.3	70927	68907.1
			Myeloperoxidase	H1,H2
			Osteopontin	H3,H4	98970.9	124264	100084	103194		4097.67
			PDGF-AA	H5,H6	3217.69	5281.7	4663.96	5524.41		152.64
			PDGF-AB/BB	H7,H8
			Pentraxin 3	H9,H10	4680.89	15875.5	5333.93	18285.4
			PF4	H11,H12
			RAGE	H13,H14
			Rantes	H15,H16
			RBP-4	H17,H18	3754.08	5686.08	5911.59	6758.72
			Relaxin-2	H19,H20
			Resistin	H21,H22	3489.83	9547.55	3011.26	3680.29
			SDF-1α	H23,H24	11253.6	13302.2	9475.53	18130.9		10.4788
			Serpin E1	I1,I2	154304	193911	157188	189931
			SHBG	I3,I4
			ST2	I5,I6	1864.18	3420.2	2905.83	7224.79
			TARC	I7,I8
			TFF3	I9,I10	5495.13	7745.67	9243.1	15683.7
			TfR	I11,I12
			TGF-α	I13,I14
			Thrombospondin-1	I15,I16	4223.59	12392.9	5226.48	11045.7
			TNFα	I17,I18
			uPAR	I19,I20	43761	52808.1	57126	65959.2		980.332
			VEGF	I21,I22	237239	279892	253173	314344		102.227
			Reference Spot	J1,J2
			Vitamin D BP	J5,J6	8658.26	38033	8019.38	9505.45
			CD31	J7,J8	14020.4	21718.2	19441.5	25797.8
			TIM-3	J9,J10	3741.53	7425.9	5595.31	7657.19
			Vcam-1	J11,J12	66793.3	73726.2	74335.6	91188.2
			Negative Control	J23,J24

## Sheet: Supplementary S5
Supplementary S5: Validation of selected cytokines in explant supernatants at day 3. Data are normalized on the wet weight of each explant. The levels of MCP-1, IL-6, LCN2, Dkk-1 and PDGF-AA under different stimuli are expressed as ng/mL or pg/mL. The bar graph shows the modulation of Dkk-1. Statistical significance is shown as *** p < 0.001.
					ng/ml					pg/ml
	List of validated cytokines				mean	SD				mean	SD
	MCP-1		MCP-1	CTRL	20.9256	25.5209		PDGF-AA	CTRL	24.6213	9.70262
	IL-6			CM	7.7975	8.29893			CM	21.2607	8.1418
	LCN2			TNF	10.7918	11.4456			TNF	18.7233	9.06628
	Dkk-1			TNF+CM	8.23222	7.715			TNF+CM	18.167	6.69577
	PDGF-AA		IL-6	CTRL	18.1081	27.2872
				CM	12.5714	13.3575
				TNF	20.5696	25.7685
				TNF+CM	14.1137	18.682
			LCN2	CTRL	4.3635	3.36432
				CM	2.77427	2.33442
				TNF	3.80654	1.61989
				TNF+CM	3.03769	2.75391
			Dkk-1	CTRL	1.64224	1.21053
				CM	7.81017	2.2824
				TNF	1.61975	0.669161
				TNF+CM	7.45929	2.96509
